# Supplementary material
Source: publisher site journal article supplement (https://www.dovepress.com/get_supplementary_file.php?f=291071.docx)
Supplement: Supplementary file 1 [file get_supplementary_file.php]

**Supplementary Table: Age and factors of the second to fifth times hip fracture of partial elderly included in NHANES from 2005 to 2010**

| Age when 2nd time hip fracture occurred, years | 76.33±7.77 (70-85) | 71.33±9.61 (61-80) | 60.60±20.27 (33-80) | 70.91±14.25 (33-85) |
| --- | --- | --- | --- | --- |
| Factors of 2nd time hip fracture, (*n*) |  |  |  |  |
| Tumble | 3 | 4 | 2 | 9 (81.8) |
| Fall from height | 0 | 0 | 2 | 2 (18.2) |
| Traffic accidents | 0 | 0 | 0 | 0 |
| Age when 3rd time hip fracture occurred, years | 82 | 73 | N/A | 77.50±6.36 (73-82) |
| Factors of 3rd time hip fracture, (*n*) |  |  |  |  |
| Tumble | 1 | 1 | N/A | 2 (100) |
| Fall from height | 0 | 0 | N/A | 0 |
| Traffic accidents | 0 | 0 | N/A | 0 |
| Age when 4th time hip fracture occurred, years | N/A | 73 | N/A | 73 |
| Factors of 4th time hip fracture, (*n*) |  |  |  |  |
| Tumble | N/A | 1 | N/A | 1 (100) |
| Fall from height | N/A | 0 | N/A | 0 |
| Traffic accidents | N/A | 0 | N/A | 0 |
| Age when 5th time hip fracture occurred, years | N/A | 74 | N/A | 74 |
| Factors of 5th time hip fracture, (*n*) |  |  |  |  |
| Tumble | N/A | 1 | N/A | 1 (100) |
| Fall from height | N/A | 0 | N/A | 0 |
| Traffic accidents | N/A | 0 | N/A | 0 |

**Note:** NHANES: National Health and Nutrition Examination Surgery; N/A: Not applicable.
